# Supplementary material for: Temperate southern Australian coastal waters are characterised by surprisingly high rates of nitrogen fixation and diversity of diazotrophs
Source: PeerJ. 2021 Mar 1;9:e10809. doi: 10.7717/peerj.10809 (PMC7931716; doi:10.7717/peerj.10809)
Supplement: Supplemental Information 6 — Includes the raw particulate nitrogen and carbon, and stable isotope data for each sample, including the T0 natural abundance and T24 incubation data. [file peerj-09-10809-s006.xlsx]

## Sheet: Raw_data_T0_T24
Sample ID (UoH Lab)	Original Sample Code	Sample Name	Sample Type	μg N	δ15N (‰ vs. AIR)	μg C	δ13C (‰ vs. V-PDB)	Comments from UoH Lab Analyst Lyons
LM11	SAM8SG NA	A_Mouth	T0	53.2	5	377.8	-24.6
LM12	NRS K.I. NA	A_Shelf	T0	50.3	4.7	373	-26.3
LM13	Tumby NA	A_S-Gulf	T0	54.6	4	419.6	-23
LM14	Arno NA	A_M-Gulf	T0	37.8	4.4	341.7	-22
LM15	Whyalla NA	A_N-Gulf	T0	47.9	3.8	389.9	-21
LMNA5	SAM8SG NA	S_Mouth	T0	44.6	4.7	762.7	-27.3
LMNA6	Tumby Bay NA	S_S-Gulf	T0	45.5	3.2	376.8	-19.9
LMNA7	Whyalla NA	S_N-Gulf	T0	42.8	4.1	342.3	-15.8
LMNA8	NRS K.I. NA	S_Shelf	T0	36.7	5.7	1184.2		C in your sample is too large for accurate and/or precise C isotopic measurement, denotes sample where C quantification was determined be extrapolating beyond our standard curve
LMNA9	Arno Bay NA	S_M-Gulf	T0	62.8	2.7	755.5	-14.4
LM49	SAM8SG < 10 1	A_Mouth USF	T24	39.4	940.5	329.7	-28.4
LM50	SAM8SG < 10 2	A_Mouth USF	T24	42.7	902.3	310.7	-25.5
LM51	SAM8SG < 10 3	A_Mouth USF	T24	38.4	1078.7	297.6	-26.1
LM52	SAM8SG WW1	A_Mouth WC	T24	50	703.9	374.3	-24.6
LM53	SAM8SG WW2	A_Mouth WC	T24	43.8	706	369.9	-27.7
LM54	SAM8SG WW3	A_Mouth WC	T24	48.9	766.6	362.1	-24.6
LM55	NRS K.I. < 10 1	A_Shelf USF	T24	38.6	226.1	301.7	-30.4
LM56	NRS K.I. < 10 2	A_Shelf USF	T24	35.2	162.5	286.5	-30.2
LM57	NRS K.I. < 10 3	A_Shelf USF	T24	34.7	146.8	300.8	-30.7
LM58	NRS K.I. WW1	A_Shelf WC	T24	50.3	108.5	428.4	-28.9
LM59	NRS K.I. WW2	A_Shelf WC	T24	45	131.8	393.3	-28.3
LM60	NRS K.I. WW3	A_Shelf WC	T24	48.8	158.3	410.7	-28.6
LM61	Tumby < 10 1	A_S-Gulf USF	T24	72.7	290.7	501.4	-25.7
LM62	Tumby < 10 2	A_S-Gulf USF	T24	75.6	423.8	480.4	-23.8
LM63	Tumby < 10 3	A_S-Gulf USF	T24	77.3	546.9	476.7	-23.3
LM64	Tumby WW1	A_S-Gulf WC	T24	83	98.3	555.4		C in your sample is too large for accurate and/or precise C isotopic measurement
LM65	Tumby WW2	A_S-Gulf WC	T24	81.2	356.6	532.2		C in your sample is too large for accurate and/or precise C isotopic measurement
LM66	Tumby WW3	A_S-Gulf WC	T24	88.4	167.2	592.1		C in your sample is too large for accurate and/or precise C isotopic measurement
LM67	Arno < 10 1	A_M-Gulf USF	T24	48.1	291.3	374.3	-26.4
LM68	Arno < 10 2	A_M-Gulf USF	T24	51	118.8	371.6	-24.6
LM69	Arno < 10 3	A_M-Gulf USF	T24	43.3	428.1	359.6	-26.4
LM70	Arno WW1	A_M-Gulf WC	T24	54	200.6	482	-26.4
LM71	Arno WW2	A_M-Gulf WC	T24	49	152	430.2	-25.5
LM72	Arno WW3	A_M-Gulf WC	T24	56.8	100.5	532.1		C in your sample is too large for accurate and/or precise C isotopic measurement
LM73	Whyalla < 10 1	A_N-Gulf USF	T24	79	266.9	513		C in your sample is too large for accurate and/or precise C isotopic measurement
LM74	Whyalla < 10 2	A_N-Gulf USF	T24	67.9	287.7	479.2	-23.2
LM75	Whyalla < 10 3	A_N-Gulf USF	T24	78.9	238.3	540.3		C in your sample is too large for accurate and/or precise C isotopic measurement
LM76	Whyalla WW1 A	A_N-Gulf WC	T24	54.7	182.2	372.1	-22
LM77	Whyalla WW1 B	A_N-Gulf WC	T24	58.2	171	436.9	-20.9
LM78	Whyalla WW2 A	A_N-Gulf WC	T24	57	201.4	393.5	-23
LM79	Whyalla WW2 B	A_N-Gulf WC	T24	53	197.8	409.5	-23.3
LM80	Whyalla WW3 A	A_N-Gulf WC	T24	57	228.2	393.7	-23
LM81	Whyalla WW3 B	A_N-Gulf WC	T24	57.8	229.2	405.5	-23.3
LM34	SAM8SG WW1 Dec.	S_Mouth WC	T24	57.4	451.2	684.2	-27.2
LM35	SAM8SG WW2 Dec.	S_Mouth WC	T24	60.2	350.2	623	-27.4
LM36	SAM8SG WW3 Dec.	S_Mouth WC	T24	64.8	752.2	730.3	-27.2
LM37	SAM8SG < 10 1 Dec.	S_Mouth USF	T24	42	973.8	491.1	-27.6
LM38	SAM8SG < 10 2 Dec.	S_Mouth USF	T24	45.3	1069.1	539.2	-28.2
LM39	SAM8SG < 10 3 Dec.	S_Mouth USF	T24	44.9	925.4	649.5	-28.1
LM40	NRS K.I. WW1 Dec.	S_Shelf WC	T24	34.8	45.1	1230.2	-27.1
LM41	NRS K.I. WW2 Dec.	S_Shelf WC	T24	41.8	41.5	1206.8	-27
LM42	NRS K.I. WW3 Dec.	S_Shelf WC	T24	53.1	31.4	1253		C in your sample is too large for accurate and/or precise C isotopic measurement, denotes sample where C quantification was determined be extrapolating beyond our standard curve
LM43	NRS K.I. < 10 1 Dec.	S_Shelf USF	T24	21.2	55.2	1035.4	-27.5
LM44	NRS K.I. < 10 2 Dec.	S_Shelf USF	T24	23.4	88.9	1027.9	-27.3
LM45	NRS K.I. < 10 3 Dec.	S_Shelf USF	T24	23.4	89.3	942.6	-27.3
LM46	Tumby Bay WW1 A Dec. 2L	S_S-Gulf WC	T24	49.2	151.8	299.2	-22.6
LM47	Tumby Bay WW1 B Dec. 2L	S_S-Gulf WC	T24	68	123.3	523.5	-21.8
LM48	Tumby Bay WW2 A Dec. 2L	S_S-Gulf WC	T24	67.3	66.1	406.2	-21
LM49	Tumby Bay WW2 B Dec. 2L	S_S-Gulf WC	T24	67.9	64.1	472	-19.6
LM50	Tumby Bay WW3 A Dec. 1.5L	S_S-Gulf WC	T24	36.4	363	223.2	-21.9
LM51	Tumby Bay WW3 B Dec. 2.5L	S_S-Gulf WC	T24	67.7	333.5	445	-20.9
LM52	Tumby Bay < 10 1 Dec.	S_S-Gulf USF	T24	82.7	159.1	526.4	-21.2
LM53	Tumby Bay < 10 2 Dec.	S_S-Gulf USF	T24	78.3	389	498.5	-21.4
LM54	Tumby Bay < 10 3 Dec.	S_S-Gulf USF	T24	77.3	442.9	506.1	-20.9
LM55	Whyalla WW1 Dec.	S_N-Gulf WC	T24	10.7	214.1	79.1	-19.1
LM56	Whyalla WW2 Dec.	S_N-Gulf WC	T24	71	227.8	564.9	-17.9
LM57	Whyalla WW3 Dec.	S_N-Gulf WC	T24	68.5	169.2	539.3	-18.2
LM58	Whyalla < 10 1 Dec.	S_N-Gulf USF	T24	79.1	209.4	554.4	-17.6
LM59	Whyalla < 10 2 Dec.	S_N-Gulf USF	T24	88.9	100.1	588.2	-16.1
LM60	Whyalla < 10 3 Dec.	S_N-Gulf USF	T24	71.4	161.2	523.8	-17.3
LM61	Arno Bay WW1 A Dec. 2L	S_M-Gulf WC	T24	61.1	62.4	583.8	-18.2
LM62	Arno Bay WW1 B Dec. 2L	S_M-Gulf WC	T24	92.2	50.4	1096.7	-14.5
LM63	Arno Bay WW2 A Dec. 2L	S_M-Gulf WC	T24	51	78.3	437.6	-17.4
LM64	Arno Bay WW2 B Dec. 2L	S_M-Gulf WC	T24	73.2	65.1	861.6	-14.4
LM65	Arno Bay WW3 A Dec. 2L	S_M-Gulf WC	T24	53.7	71.9	435.6	-18.5
LM66	Arno Bay WW3 B Dec. 2L	S_M-Gulf WC	T24	98.1	53.3	1282.2		C in your sample is too large for accurate and/or precise C isotopic measurement, denotes sample where C quantification was determined be extrapolating beyond our standard curve
LM67	Arno Bay < 10 1 Dec.	S_M-Gulf USF	T24	49.6	114.6	384.6	-18.9
LM68	Arno Bay < 10 2 Dec.	S_M-Gulf USF	T24	43.2	132.4	315.2	-17.6
LM69	Arno Bay < 10 3 Dec.	S_M-Gulf USF	T24	48	85.7	373.9	-18.4

## Sheet: NF_Rates
Sample ID/Name	Time (hr)	Vol Incubation (L)	Filt vol (L)	ml/l N2	mol 14N	mol 15N	AN2 (atom%)	ml 15N2 added	mol 15N added	AN2 (atom%_corrected)	d15Ni	d15Nf	APN0	APNf	V (h-1)	PN final (ug)	PN final (ug l-1)	PNf (nmol l-1)	rho (nM h-1)	rho (nM d-1)	Average NF Rate (USF and WC)	Stnd Dev NF	Standard Error
A_Mouth
April May 2014
SAM8SG < 10 1	24	4	3	9.66	0.00343732	1.26822e-05	0.3676	3	0.000267857	5.42195	5	940.5	0.368078	0.708275	0.00280476	39.4	13.1333	937.644	2.62986	63.1167	63.2815	2.79601	1.61428
SAM8SG < 10 2	24	4	3.25	9.66	0.00343732	1.26822e-05	0.3676	3	0.000267857	5.42195	5	902.3	0.368078	0.694429	0.0026906	42.7	13.1385	938.01	2.52381	60.5715
SAM8SG < 10 3	24	4	3.2	9.66	0.00343732	1.26822e-05	0.3676	3	0.000267857	5.42195	5	1078.7	0.368078	0.758335	0.00321748	38.4	12	856.73	2.75651	66.1562
SAM8SG WW1	24	4	2.8	9.66	0.00343732	1.26822e-05	0.3676	3	0.000267857	5.42195	5	703.9	0.368078	0.622455	0.00209721	50	17.8571	1274.9	2.67372	64.1694	64.0199	3.22999	1.86483
SAM8SG WW2	24	4	2.6	9.66	0.00343732	1.26822e-05	0.3676	3	0.000267857	5.42195	5	706	0.368078	0.623217	0.00210349	43.8	16.8462	1202.72	2.52991	60.7178
SAM8SG WW3	24	4	2.85	9.66	0.00343732	1.26822e-05	0.3676	3	0.000267857	5.42195	5	766.6	0.368078	0.645212	0.00228483	48.9	17.1579	1224.97	2.79886	67.1726
A_Shelf
NRS K.I. < 10 1	25	4	4	9.62	0.00342308	1.26297e-05	0.3676	3	0.000267857	5.44286	4.7	226.1	0.367969	0.448692	0.000636256	38.6	9.65	688.954	0.438351	10.5204	7.81056	2.378	1.37294
NRS K.I. < 10 2	25	4	4	9.62	0.00342308	1.26297e-05	0.3676	3	0.000267857	5.44286	4.7	162.5	0.367969	0.425517	0.000453589	35.2	8.8	628.269	0.284976	6.83942
NRS K.I. < 10 3	25	4	4	9.62	0.00342308	1.26297e-05	0.3676	3	0.000267857	5.44286	4.7	146.8	0.367969	0.419794	0.000408484	34.7	8.675	619.345	0.252992	6.07181
NRS K.I. WW1	24	4	4	9.62	0.00342308	1.26297e-05	0.3676	3	0.000267857	5.44286	4.7	108.5	0.367969	0.405831	0.000310862	50.3	12.575	897.782	0.279086	6.69807	7.88304	1.53292	0.885034
NRS K.I. WW2	24	4	4	9.62	0.00342308	1.26297e-05	0.3676	3	0.000267857	5.44286	4.7	131.8	0.367969	0.414326	0.000380609	45	11.25	803.185	0.305699	7.33678
NRS K.I. WW3	24	4	4	9.62	0.00342308	1.26297e-05	0.3676	3	0.000267857	5.44286	4.7	158.3	0.367969	0.423986	0.00045992	48.8	12.2	871.009	0.400595	9.61427
A_S-Gulf
Tumby < 10 1	25.5	4	3.5	9.71	0.00345511	1.27478e-05	0.3676	3	0.000267857	5.39604	4	290.7	0.367713	0.472221	0.000815049	72.7	20.7714	1482.96	1.20868	29.0084	43.8362	14.6742	8.47215
Tumby < 10 2	25.5	4	3.5	9.71	0.00345511	1.27478e-05	0.3676	3	0.000267857	5.39604	4	423.8	0.367713	0.520664	0.00119285	75.6	21.6	1542.11	1.83952	44.1484
Tumby < 10 3	25.5	4	3.5	9.71	0.00345511	1.27478e-05	0.3676	3	0.000267857	5.39604	4	546.9	0.367713	0.565425	0.00154195	77.3	22.0857	1576.79	2.43133	58.3518
Tumby WW1	24	4	3.5	9.71	0.00345511	1.27478e-05	0.3676	3	0.000267857	5.39604	4	98.3	0.367713	0.402112	0.000285038	83	23.7143	1693.06	0.482587	11.5821	25.7418	17.2073	9.93463
Tumby WW2	24	4	3.3	9.71	0.00345511	1.27478e-05	0.3676	3	0.000267857	5.39604	4	356.6	0.367713	0.496212	0.00106479	81.2	24.6061	1756.73	1.87054	44.893
Tumby WW3	24	4	3.6	9.71	0.00345511	1.27478e-05	0.3676	3	0.000267857	5.39604	4	167.2	0.367713	0.42723	0.000493175	88.4	24.5556	1753.12	0.864598	20.7503
A_M-Gulf
Arno < 10 1	22	4	4	9.54	0.00339462	1.25247e-05	0.3676	3	0.000267857	5.48517	4.4	291.3	0.367859	0.472439	0.000928934	48.1	12.025	858.515	0.797504	19.1401	17.5568	8.77564	5.06662
Arno < 10 2	22	4	4	9.54	0.00339462	1.25247e-05	0.3676	3	0.000267857	5.48517	4.4	118.8	0.367859	0.409586	0.000370642	51	12.75	910.276	0.337386	8.09727
Arno < 10 3	22	4	4	9.54	0.00339462	1.25247e-05	0.3676	3	0.000267857	5.48517	4.4	428.1	0.367859	0.522228	0.00137118	43.3	10.825	772.842	1.05971	25.433
Arno WW1	20	4	4	9.54	0.00339462	1.25247e-05	0.3676	3	0.000267857	5.48517	4.4	200.6	0.367859	0.439401	0.000699021	54	13.5	963.822	0.673731	16.1696	11.8592	3.96472	2.28903
Arno WW2	20	4	4	9.54	0.00339462	1.25247e-05	0.3676	3	0.000267857	5.48517	4.4	152	0.367859	0.421689	0.000525962	49	12.25	874.579	0.459996	11.0399
Arno WW3	20	4	4	9.54	0.00339462	1.25247e-05	0.3676	3	0.000267857	5.48517	4	100.5	0.367713	0.402914	0.000343927	56.8	14.2	1013.8	0.348672	8.36813
A_N-Gulf
Whyalla < 10 1	24.5	4	4	9.2	0.00327364	1.20783e-05	0.3676	3	0.000267857	5.67255	3.8	266.9	0.36764	0.463554	0.000737964	79	19.75	1410.04	1.04056	24.9733	23.4552	1.39399	0.9857
Whyalla < 10 2	24.5	4	4	9.2	0.00327364	1.20783e-05	0.3676	3	0.000267857	5.67255	3.8	287.7	0.36764	0.471128	0.000796245	67.9	16.975	1211.92	0.964982	23.1596
Whyalla < 10 3	24.5	4	4	9.2	0.00327364	1.20783e-05	0.3676	3	0.000267857	5.67255	3.8	238.3	0.36764	0.453136	0.000657813	78.9	19.725	1408.25	0.926366	22.2328
Whyalla WW1 A	23	4	2	9.2	0.00327364	1.20783e-05	0.3676	3	0.000267857	5.67255	3.8	182.2	0.36764	0.432696	0.00053319	54.7	27.35	1952.63	1.04112	24.987	28.5279	3.78395	1.54479
Whyalla WW1 B	23	4	2	9.2	0.00327364	1.20783e-05	0.3676	3	0.000267857	5.67255	3.8	171	0.36764	0.428615	0.000499737	58.2	29.1	2077.57	1.03824	24.9177
Whyalla WW2 A	23	4	2	9.2	0.00327364	1.20783e-05	0.3676	3	0.000267857	5.67255	3.8	201.4	0.36764	0.439693	0.000590532	57	28.5	2034.73	1.20158	28.8378
Whyalla WW2 B	23	4	2	9.2	0.00327364	1.20783e-05	0.3676	3	0.000267857	5.67255	3.8	197.8	0.36764	0.438381	0.000579781	53	26.5	1891.95	1.09691	26.326
Whyalla WW3 A	23	4	2	9.2	0.00327364	1.20783e-05	0.3676	3	0.000267857	5.67255	3.8	228.2	0.36764	0.449457	0.000670559	57	28.5	2034.73	1.36441	32.7458
Whyalla WW3 B	23	4	2	9.2	0.00327364	1.20783e-05	0.3676	3	0.000267857	5.67255	3.8	229.2	0.36764	0.449821	0.000673545	57.8	28.9	2063.29	1.38972	33.3533
S_Mouth
SAM8SG WW1 Dec. 14	24	4	4	9.51	0.00338394	1.24853e-05	0.3676	3	0.000267857	5.5012	4.7	451.2	0.367969	0.53063	0.00132033	57.4	14.35	1024.51	1.35269	32.4645	40.0366	18.657	10.7716
SAM8SG WW2 Dec. 14	24	4	4	9.51	0.00338394	1.24853e-05	0.3676	3	0.000267857	5.5012	4.7	350.2	0.367969	0.493882	0.00102205	60.2	15.05	1074.48	1.09817	26.3561
SAM8SG WW3 Dec. 14	24	4	4	9.51	0.00338394	1.24853e-05	0.3676	3	0.000267857	5.5012	4.7	752.2	0.367969	0.639987	0.00220798	64.8	16.2	1156.59	2.55372	61.2893
SAM8SG < 10 1 Dec. 14	25	4	4	9.51	0.00338394	1.24853e-05	0.3676	3	0.000267857	5.5012	4.7	973.8	0.367969	0.720342	0.00274582	42	10.5	749.639	2.05838	49.401	52.6954	5.04377	2.91202
SAM8SG < 10 2 Dec. 14	25	4	4	9.51	0.00338394	1.24853e-05	0.3676	3	0.000267857	5.5012	4.7	1069.1	0.367969	0.75486	0.00301479	45.3	11.325	808.539	2.43758	58.5019
SAM8SG < 10 3 Dec. 14	25	4	4	9.51	0.00338394	1.24853e-05	0.3676	3	0.000267857	5.5012	4.7	925.4	0.367969	0.702803	0.00260915	44.9	11.225	801.4	2.09097	50.1833
S_Shelf
NRS K.I. WW1 Dec. 14	24	4	4	9.54	0.00339462	1.25247e-05	0.3676	3	0.000267857	5.48517	5.7	45.1	0.368334	0.382708	0.000117055	34.8	8.7	621.13	0.0727066	1.74496	1.79542	0.094527	0.0545752
NRS K.I. WW2 Dec. 14	24	4	4	9.54	0.00339462	1.25247e-05	0.3676	3	0.000267857	5.48517	5.7	41.5	0.368334	0.381395	0.000106361	41.8	10.45	746.069	0.079353	1.90447
NRS K.I. WW3 Dec. 14	24	4	4	9.54	0.00339462	1.25247e-05	0.3676	3	0.000267857	5.48517	5.7	31.4	0.368334	0.377711	7.63572e-05	53.1	13.275	947.758	0.0723682	1.73684
NRS K.I. < 10 1 Dec. 14	24.5	4	4	9.54	0.00339462	1.25247e-05	0.3676	3	0.000267857	5.48517	5.7	55.2	0.368334	0.386393	0.000144055	21.2	5.3	378.389	0.054509	1.30822	2.05779	0.649176	0.374802
NRS K.I. < 10 2 Dec. 14	24.5	4	4	9.54	0.00339462	1.25247e-05	0.3676	3	0.000267857	5.48517	5.7	88.9	0.368334	0.398684	0.0002421	23.4	5.85	417.656	0.101114	2.42674
NRS K.I. < 10 3 Dec. 14	24.5	4	4	9.54	0.00339462	1.25247e-05	0.3676	3	0.000267857	5.48517	5.7	89.3	0.368334	0.39883	0.000243263	23.4	5.85	417.656	0.1016	2.43841
S_S-Gulf
Tumby Bay WW1 A Dec. 14 2L	24	4	2	9.2	0.00327364	1.20783e-05	0.3676	3	0.000267857	5.67255	3.2	151.8	0.367421	0.421617	0.000425651	49.2	24.6	1756.3	0.74757	17.9417	16.1256	5.07584	3.58916
Tumby Bay WW1 B Dec. 14 2L	24	4	2	9.2	0.00327364	1.20783e-05	0.3676	3	0.000267857	5.67255	3.2	123.3	0.367421	0.411227	0.000344051	68	34	2427.4	0.835151	20.0436
Tumby Bay WW2 A Dec. 14 2L	24	4	2	9.2	0.00327364	1.20783e-05	0.3676	3	0.000267857	5.67255	3.2	66.1	0.367421	0.390369	0.000180228	67.3	33.65	2402.41	0.432982	10.3916
Tumby Bay WW2 B Dec. 14 2L	24	4	2	9.2	0.00327364	1.20783e-05	0.3676	3	0.000267857	5.67255	3.2	64.1	0.367421	0.389639	0.000174499	67.9	33.95	2423.83	0.422955	10.1509
Tumby Bay WW3 A Dec. 14 1.5L	24	4	2	9.2	0.00327364	1.20783e-05	0.3676	3	0.000267857	5.67255	3.2	363	0.367421	0.498541	0.00102982	36.4	18.2	1299.37	1.33812	32.1149
Tumby Bay WW3 B Dec. 14 2.5L	24	4	2	9.2	0.00327364	1.20783e-05	0.3676	3	0.000267857	5.67255	3.2	333.5	0.367421	0.487803	0.000945485	67.7	33.85	2416.69	2.28495	54.8388
Tumby Bay < 10 1 Dec. 14	25	4	4	9.2	0.00327364	1.20783e-05	0.3676	3	0.000267857	5.67255	3.2	159.1	0.367421	0.424277	0.000428687	82.7	20.675	1476.08	0.632775	15.1866
Tumby Bay < 10 2 Dec. 14	25	4	4	9.2	0.00327364	1.20783e-05	0.3676	3	0.000267857	5.67255	3.2	389	0.367421	0.508003	0.00105997	78.3	19.575	1397.54	1.48135	35.5523	31.7506	16.7784	6.84977
Tumby Bay < 10 3 Dec.14	25	4	3.75	9.2	0.00327364	1.20783e-05	0.3676	3	0.000267857	5.67255	3.2	442.9	0.367421	0.527612	0.00120781	77.3	20.6133	1471.67	1.77751	42.6602
S_N-Gulf
Whyalla WW1 Dec. 14	24	4	3.5	9.54	0.00339462	1.25247e-05	0.3676	3	0.000267857	5.48517	4.1	214.1	0.36775	0.44432	0.000623446	10.7	3.05714	218.262	0.136075	3.26579	14.2628	10.0863	5.8233
Whyalla WW2 Dec. 14	24	4	3.5	9.54	0.00339462	1.25247e-05	0.3676	3	0.000267857	5.48517	4.1	227.8	0.36775	0.449311	0.000664085	71	20.2857	1448.28	0.961783	23.0828
Whyalla WW3 Dec. 14	24	4	3.5	9.54	0.00339462	1.25247e-05	0.3676	3	0.000267857	5.48517	4.1	169.2	0.36775	0.427959	0.000490228	68.5	19.5714	1397.29	0.684989	16.4397
Whyalla < 10 1 Dec. 14	25	4	3.8	9.54	0.00339462	1.25247e-05	0.3676	3	0.000267857	5.48517	4.1	209.4	0.36775	0.442608	0.000585123	79.1	20.8158	1486.13	0.869567	20.8696	15.649	5.22299	3.01549
Whyalla < 10 2 Dec. 14	25	4	4	9.54	0.00339462	1.25247e-05	0.3676	3	0.000267857	5.48517	4.1	100.1	0.36775	0.402768	0.000273718	88.9	22.225	1586.74	0.434318	10.4236
Whyalla < 10 3 Dec. 14	25	4	3.5	9.54	0.00339462	1.25247e-05	0.3676	3	0.000267857	5.48517	4.1	161.2	0.36775	0.425043	0.000447828	71.4	20.4	1456.44	0.652235	15.6536
S_M-Gulf
Arno Bay WW1 A Dec. 14 2L	21	4	2	9.2	0.00327364	1.20783e-05	0.3676	3	0.000267857	5.67255	5.4	62.4	0.368224	0.389019	0.000186684	61.1	30.55	2181.09	0.407174	9.77218	10.6153	0.948501	0.670691
Arno Bay WW1 B Dec. 14 2L	21	4	2	9.2	0.00327364	1.20783e-05	0.3676	3	0.000267857	5.67255	5.4	50.4	0.368224	0.384642	0.000147388	92.2	46.1	3291.27	0.485095	11.6423
Arno Bay WW2 A Dec. 14 2L	21	4	2	9.2	0.00327364	1.20783e-05	0.3676	3	0.000267857	5.67255	5.4	78.3	0.368224	0.394818	0.000238745	51	25.5	1820.55	0.434647	10.4315
Arno Bay WW2 B Dec. 14 2L	21	4	2	9.2	0.00327364	1.20783e-05	0.3676	3	0.000267857	5.67255	5.4	65.1	0.368224	0.390004	0.000195525	73.2	36.6	2613.03	0.510911	12.2619
Arno Bay WW3 A Dec. 14 2L	21	4	2	9.2	0.00327364	1.20783e-05	0.3676	3	0.000267857	5.67255	5.4	71.9	0.368224	0.392484	0.00021779	53.7	26.85	1916.93	0.417489	10.0197
Arno Bay WW3 B Dec. 14 2L	21	4	2	9.2	0.00327364	1.20783e-05	0.3676	3	0.000267857	5.67255	5.4	53.3	0.368224	0.3857	0.000156885	98.1	49.05	3501.89	0.549393	13.1854
Arno Bay < 10 1 Dec. 14	22	4	3	9.2	0.00327364	1.20783e-05	0.3676	3	0.000267857	5.67255	5.4	114.6	0.368224	0.408055	0.000341325	49.6	16.5333	1180.38	0.402894	9.66946
Arno Bay < 10 2 Dec. 14	22	4	2	9.2	0.00327364	1.20783e-05	0.3676	3	0.000267857	5.67255	5.4	132.4	0.368224	0.414545	0.000396936	43.2	21.6	1542.11	0.612121	14.6909	11.1182	2.81419	1.14889
Arno Bay < 10 3 Dec. 14	22	4	3	9.2	0.00327364	1.20783e-05	0.3676	3	0.000267857	5.67255	5.4	85.7	0.368224	0.397517	0.000251019	48	16	1142.31	0.286741	6.88178
