# Supplementary material for: Temperate southern Australian coastal waters are characterised by surprisingly high rates of nitrogen fixation and diversity of diazotrophs
Source: PeerJ. 2021 Mar 1;9:e10809. doi: 10.7717/peerj.10809 (PMC7931716; doi:10.7717/peerj.10809)
Supplement: Supplemental Information 7 [file peerj-09-10809-s007.xlsx]

## Sheet: qPCR_Env_Raw_Data
Sample_ID	Full_sample_name	Sample_Name	Replicate	Sampling_time (AEST)	Season	UCYN-A2_DNA_nifH_copies_per_L	Mean_UCYN-A2_DNA_nifH_copies_per_L	SD	UCYN-A1_DNA_nifH_copies_per_L	Mean_UCYN-A1_DNA_nifH_copies_per_L	SD	Temperature_degreesC	Salinity	NO3/NO2_µM	PO4_µM	SIO4_µM
DEC AB 1	Arno Bay mid Spencer Gulf	S_M-Gulf	1	07:55:00	Summer	0	0	0	190	310	220	21.1	36.9	0.03	0.05	0.53
DEC AB 2	Arno Bay mid Spencer Gulf	S_M-Gulf	2	07:55:00	Summer	0			180
DEC AB 3	Arno Bay mid Spencer Gulf	S_M-Gulf	3	07:55:00	Summer	0			570
DEC KI 1	Kangaroo Island National Reference Station	S_Shelf	1	06:30:00	Summer	6400	19000	14000	85000	54000	47000	18.7	36	0.02	0.08	0.24
DEC KI 2	Kangaroo Island National Reference Station	S_Shelf	2	06:30:00	Summer	17000			76000
DEC KI 3	Kangaroo Island National Reference Station	S_Shelf	3	06:30:00	Summer	34000			0
DEC SGM 1	Spencer Gulf mouth monitoring station SAM8SG	S_Mouth	1	09:00:00	Summer	4200	6400	7700	21000	37000	46000	19.6	36	0.01	0.04	0.24
DEC SGM 2	Spencer Gulf mouth monitoring station SAM8SG	S_Mouth	2	09:00:00	Summer	15000			89000
DEC SGM 3	Spencer Gulf mouth monitoring station SAM8SG	S_Mouth	3	09:00:00	Summer	150			0
DEC TB 1	Tumby Bay southern Spencer Gulf	S_S-Gulf	1	15:50:00	Summer	11000	9100	4000	0	30000	26000	22.3	36.5	0.03	0.02	0.52
DEC TB 2	Tumby Bay southern Spencer Gulf	S_S-Gulf	2	15:50:00	Summer	4600			48000
DEC TB 3	Tumby Bay southern Spencer Gulf	S_S-Gulf	3	15:50:00	Summer	12000			42000
DEC WHY 1	Whyalla northern Spencer Gulf	S_N-Gulf	1	16:00:00	Summer	0	0	0	0	0	0	23.1	40.3	0.04	0.02	0.39
DEC WHY 2	Whyalla northern Spencer Gulf	S_N-Gulf	2	16:00:00	Summer	0			0
DEC WHY 3	Whyalla northern Spencer Gulf	S_N-Gulf	3	16:00:00	Summer	0			0
MAY AB 1	Arno Bay mid Spencer Gulf	A_M-Gulf	1	07:30:00	Autumn	0	69	120	0	0	0	18.8	37.7	0.01	0.02	0.52
MAY AB 2	Arno Bay mid Spencer Gulf	A_M-Gulf	2	07:30:00	Autumn	0			0
MAY AB 3	Arno Bay mid Spencer Gulf	A_M-Gulf	3	07:30:00	Autumn	210			0
MAY KI 1	Kangaroo Island National Reference Station	A_Shelf	1	14:30:00	Autumn	0	0	0	0	1800	3000	18.9	36	0.04	0.03	0.22
MAY KI 2	Kangaroo Island National Reference Station	A_Shelf	2	14:30:00	Autumn	0			0
MAY KI 3	Kangaroo Island National Reference Station	A_Shelf	3	14:30:00	Autumn	0			5300
MAY SGM 1	Spencer Gulf mouth monitoring station SAM8SG	A_Mouth	1	08:00:00	Autumn	380	250	220	3000	2700	580	18.7	36	0.02	0.06	0.36
MAY SGM 2	Spencer Gulf mouth monitoring station SAM8SG	A_Mouth	2	08:00:00	Autumn	370			3000
MAY SGM 3	Spencer Gulf mouth monitoring station SAM8SG	A_Mouth	3	08:00:00	Autumn	0			2000
MAY TB 1	Tumby Bay southern Spencer Gulf	A_S-Gulf	1	15:00:00	Autumn	15000	11000	5900	0	0	0	18	37	0.01	0.01	0.25
MAY TB 2	Tumby Bay southern Spencer Gulf	A_S-Gulf	2	15:00:00	Autumn	14000			0
MAY TB 3	Tumby Bay southern Spencer Gulf	A_S-Gulf	3	15:00:00	Autumn	4600			0
MAY WHY 1	Whyalla northern Spencer Gulf	A_N-Gulf	1	16:00:00	Autumn	790	940	260	0	0	0	20.1	40	0.04	0.03	1.1
MAY WHY 2	Whyalla northern Spencer Gulf	A_N-Gulf	2	16:00:00	Autumn	790			0
MAY WHY 3	Whyalla northern Spencer Gulf	A_N-Gulf	3	16:00:00	Autumn	1200			0

## Sheet: Sheet1
0.00027
3.2e-07			3.2e-07		0.0545752
					0.374802
					0.670691
0.00027032					0.885034
					0.9857
					1.14889
					1.37294
					1.54479
					1.61428
					1.86483
					2.28903
					2.91202
					3.01549
					3.58916
					5.06662
					5.8233
					6.84977
					8.47215
					9.93463
					10.7716

## Sheet: NF rate (corrected_contaminate)
sample ID	depth (m)	Descrip.	Start time	Stop Time	incub time (hr)	incub vol (L)	filt vol (L)	ml/l N2	mol 14N	mol 15N	AN2 (atom%)	ml 15N2 added	mol 15N added plus contamination	AN2 (atom%_corrected)	d15Ni	d15Nf	APN0	APNf	V (h-1)	PN final (ug)	PN final (ug l-1)	PNf (nmol l-1)	rho (nM h-1)	rho (nM d-1)	Average NF Rate	Stnd Dev NF	Standard Error	NF RATE NO CONTAMINATION
April May 2014
SAM8SG < 10 1	1				24	4	3	9.66	0.00343732	1.26822e-05	0.3676	3	0.000268177	5.42796	5	940.5	0.368078	0.708275	0.00280143	39.4	13.1333	937.644	2.62674	63.0417	63.2063	2.79269	1.61236	63.1167	0.0749514		0.00155088
SAM8SG < 10 2	1				24	4	3.25	9.66	0.00343732	1.26822e-05	0.3676	3	0.000268177	5.42796	5	902.3	0.368078	0.694429	0.00268741	42.7	13.1385	938.01	2.52081	60.4996				60.5715	0.0719289		0.002059
SAM8SG < 10 3	1				24	4	3.2	9.66	0.00343732	1.26822e-05	0.3676	3	0.000268177	5.42796	5	1078.7	0.368078	0.758335	0.00321365	38.4	12	856.73	2.75324	66.0777				66.1562	0.0785608		0.00206863
SAM8SG WW1	1				24	4	2.8	9.66	0.00343732	1.26822e-05	0.3676	3	0.000268177	5.42796	5	703.9	0.368078	0.622455	0.00209472	50	17.8571	1274.9	2.67055	64.0932	63.9439	3.22615	1.86262	64.1694	0.0762014		0.00225773
SAM8SG WW2	1				24	4	2.6	9.66	0.00343732	1.26822e-05	0.3676	3	0.000268177	5.42796	5	706	0.368078	0.623217	0.002101	43.8	16.8462	1202.72	2.5269	60.6457				60.7178	0.0721027		0.00287689
SAM8SG WW3	1				24	4	2.85	9.66	0.00343732	1.26822e-05	0.3676	3	0.000268177	5.42796	5	766.6	0.368078	0.645212	0.00228212	48.9	17.1579	1224.97	2.79553	67.0928				67.1726	0.0797678		0.00289071
																															0.00387113
NRS K.I. < 10 1	1				25	4	4	9.62	0.00342308	1.26297e-05	0.3676	3	0.000268177	5.44889	4.7	226.1	0.367969	0.448692	0.000635501	38.6	9.65	688.954	0.437831	10.5079	7.80129	2.37518	1.37131	10.5204	0.0124856		0.00720597
NRS K.I. < 10 2	1				25	4	4	9.62	0.00342308	1.26297e-05	0.3676	3	0.000268177	5.44889	4.7	162.5	0.367969	0.425517	0.000453051	35.2	8.8	628.269	0.284638	6.83131				6.83942	0.00811697		0.00794921
NRS K.I. < 10 3	1				25	4	4	9.62	0.00342308	1.26297e-05	0.3676	3	0.000268177	5.44889	4.7	146.8	0.367969	0.419794	0.000407999	34.7	8.675	619.345	0.252692	6.06461				6.07181	0.00720597		0.00811685
NRS K.I. WW1	1				24	4	4	9.62	0.00342308	1.26297e-05	0.3676	3	0.000268177	5.44889	4.7	108.5	0.367969	0.405831	0.000310493	50.3	12.575	897.782	0.278755	6.69012	7.87368	1.5311	0.883983	6.69807	0.00794921		0.00811697
NRS K.I. WW2	1				24	4	4	9.62	0.00342308	1.26297e-05	0.3676	3	0.000268177	5.44889	4.7	131.8	0.367969	0.414326	0.000380157	45	11.25	803.185	0.305336	7.32807				7.33678	0.00870722		0.00870722
NRS K.I. WW3	1				24	4	4	9.62	0.00342308	1.26297e-05	0.3676	3	0.000268177	5.44889	4.7	158.3	0.367969	0.423986	0.000459374	48.8	12.2	871.009	0.400119	9.60286				9.61427	0.0114101		0.00959836
																															0.00991914
Tumby < 10 1					25.5	4	3.5	9.71	0.00345511	1.27478e-05	0.3676	3	0.000268177	5.40202	4	290.7	0.367713	0.472221	0.00081408	72.7	20.7714	1482.96	1.20725	28.974	43.7841	14.6568	8.46208	29.0084	0.03447		0.0114048
Tumby < 10 2					25.5	4	3.5	9.71	0.00345511	1.27478e-05	0.3676	3	0.000268177	5.40202	4	423.8	0.367713	0.520664	0.00119144	75.6	21.6	1542.11	1.83733	44.0959				44.1484	0.0524605		0.0114101
Tumby < 10 3					25.5	4	3.5	9.71	0.00345511	1.27478e-05	0.3676	3	0.000268177	5.40202	4	546.9	0.367713	0.565425	0.00154011	77.3	22.0857	1576.79	2.42844	58.2825				58.3518	0.0693381		0.011526
Tumby WW1					24	4	3.5	9.71	0.00345511	1.27478e-05	0.3676	3	0.000268177	5.40202	4	98.3	0.367713	0.402112	0.000284699	83	23.7143	1693.06	0.482013	11.5683	25.7112	17.1868	9.92283	11.5821	0.0137627		0.011818
Tumby WW2					24	4	3.3	9.71	0.00345511	1.27478e-05	0.3676	3	0.000268177	5.40202	4	356.6	0.367713	0.496212	0.00106352	81.2	24.6061	1756.73	1.86832	44.8397				44.893	0.0533453		0.0119709
Tumby WW3					24	4	3.6	9.71	0.00345511	1.27478e-05	0.3676	3	0.000268177	5.40202	4	167.2	0.367713	0.42723	0.000492589	88.4	24.5556	1753.12	0.86357	20.7257				20.7503	0.0246571		0.0122547
																															0.0123037
Arno < 10 1					22	4	4	9.54	0.00339462	1.25247e-05	0.3676	3	0.000268177	5.49124	4.4	291.3	0.367859	0.472439	0.000927833	48.1	12.025	858.515	0.796558	19.1174	17.536	8.76524	5.06061	19.1401	0.0226883		0.0123557
Arno < 10 2					22	4	4	9.54	0.00339462	1.25247e-05	0.3676	3	0.000268177	5.49124	4.4	118.8	0.367859	0.409586	0.000370202	51	12.75	910.276	0.336986	8.08767				8.09727	0.00959836		0.0124856
Arno < 10 3					22	4	4	9.54	0.00339462	1.25247e-05	0.3676	3	0.000268177	5.49124	4.4	428.1	0.367859	0.522228	0.00136956	43.3	10.825	772.842	1.05845	25.4028				25.433	0.0301478		0.0130865
Arno WW1					20	4	4	9.54	0.00339462	1.25247e-05	0.3676	3	0.000268177	5.49124	4.4	200.6	0.367859	0.439401	0.000698192	54	13.5	963.822	0.672933	16.1504	11.8451	3.96002	2.28632	16.1696	0.0191671		0.0137317
Arno WW2					20	4	4	9.54	0.00339462	1.25247e-05	0.3676	3	0.000268177	5.49124	4.4	152	0.367859	0.421689	0.000525339	49	12.25	874.579	0.45945	11.0268				11.0399	0.0130865		0.0137627
Arno WW3					20	4	4	9.54	0.00339462	1.25247e-05	0.3676	3	0.000268177	5.49124	4	100.5	0.367713	0.402914	0.000343519	56.8	14.2	1013.8	0.348259	8.35821				8.36813	0.00991914		0.0144625
																															0.0155518
Whyalla < 10 1					24.5	4	4	9.2	0.00327364	1.20783e-05	0.3676	3	0.000268177	5.67881	3.8	266.9	0.36764	0.463554	0.000737094	79	19.75	1410.04	1.03933	24.9439	23.4276	1.39235	0.984537	24.9733	0.0294521		0.0173275
Whyalla < 10 2					24.5	4	4	9.2	0.00327364	1.20783e-05	0.3676	3	0.000268177	5.67881	3.8	287.7	0.36764	0.471128	0.000795306	67.9	16.975	1211.92	0.963844	23.1323				23.1596	0.027313		0.0179094
Whyalla < 10 3					24.5	4	4	9.2	0.00327364	1.20783e-05	0.3676	3	0.000268177	5.67881	3.8	238.3	0.36764	0.453136	0.000657037	78.9	19.725	1408.25	0.925273	22.2066				22.2328	0.02622		0.0185551
Whyalla WW1 A					23	4	2	9.2	0.00327364	1.20783e-05	0.3676	3	0.000268177	5.67881	3.8	182.2	0.36764	0.432696	0.000532561	54.7	27.35	1952.63	1.0399	24.9575	24.9229			24.987	0.0294681		0.0191671
Whyalla WW1 B					23	4	2	9.2	0.00327364	1.20783e-05	0.3676	3	0.000268177	5.67881	3.8	171	0.36764	0.428615	0.000499147	58.2	29.1	2077.57	1.03701	24.8883	27.5494			24.9177	0.0293865		0.0194869
Whyalla WW2 A					23	4	2	9.2	0.00327364	1.20783e-05	0.3676	3	0.000268177	5.67881	3.8	201.4	0.36764	0.439693	0.000589836	57	28.5	2034.73	1.20016	28.8038	33.0106			28.8378	0.0340096		0.0211585
Whyalla WW2 B					23	4	2	9.2	0.00327364	1.20783e-05	0.3676	3	0.000268177	5.67881	3.8	197.8	0.36764	0.438381	0.000579097	53	26.5	1891.95	1.09562	26.2949				26.326	0.0310473		0.0226883
Whyalla WW3 A					23	4	2	9.2	0.00327364	1.20783e-05	0.3676	3	0.000268177	5.67881	3.8	228.2	0.36764	0.449457	0.000669768	57	28.5	2034.73	1.3628	32.7072	28.4943	3.77948	1.54297	32.7458	0.0386185		0.0236373
Whyalla WW3 B					23	4	2	9.2	0.00327364	1.20783e-05	0.3676	3	0.000268177	5.67881	3.8	229.2	0.36764	0.449821	0.00067275	57.8	28.9	2063.29	1.38808	33.3139				33.3533	0.0393349		0.0246571
																															0.0247379
																															0.02622
2014-12-01																															0.027313
SAM8SG WW1 Dec. 14					24	4	4	9.51	0.00338394	1.24853e-05	0.3676	3	0.000268177	5.50729	4.7	451.2	0.367969	0.53063	0.00131877	57.4	14.35	1024.51	1.35109	32.4261	39.9892	18.6349	10.7589	32.4645	0.0384668		0.0273613
SAM8SG WW2 Dec. 14					24	4	4	9.51	0.00338394	1.24853e-05	0.3676	3	0.000268177	5.50729	4.7	350.2	0.367969	0.493882	0.00102083	60.2	15.05	1074.48	1.09687	26.3249				26.3561	0.0312289		0.0293865
SAM8SG WW3 Dec. 14					24	4	4	9.51	0.00338394	1.24853e-05	0.3676	3	0.000268177	5.50729	4.7	752.2	0.367969	0.639987	0.00220536	64.8	16.2	1156.59	2.55069	61.2166				61.2893	0.0726208		0.0294521
SAM8SG < 10 1 Dec. 14					25	4	4	9.51	0.00338394	1.24853e-05	0.3676	3	0.000268177	5.50729	4.7	973.8	0.367969	0.720342	0.00274257	42	10.5	749.639	2.05594	49.3425	52.633	5.03779	2.90857	49.401	0.0585346		0.0294681
SAM8SG < 10 2 Dec. 14					25	4	4	9.51	0.00338394	1.24853e-05	0.3676	3	0.000268177	5.50729	4.7	1069.1	0.367969	0.75486	0.00301122	45.3	11.325	808.539	2.43469	58.4326				58.5019	0.0693181		0.0301478
SAM8SG < 10 3 Dec. 14					25	4	4	9.51	0.00338394	1.24853e-05	0.3676	3	0.000268177	5.50729	4.7	925.4	0.367969	0.702803	0.00260606	44.9	11.225	801.4	2.08849	50.1238				50.1833	0.0594615		0.0310473
																															0.0312289
NRS K.I. WW1 Dec. 14					24	4	4	9.54	0.00339462	1.25247e-05	0.3676	3	0.000268177	5.49124	5.7	45.1	0.368334	0.382708	0.000116917	34.8	8.7	621.13	0.0726204	1.74289	1.79329	0.094415	0.0545105	1.74496	0.00206863		0.0340096
NRS K.I. WW2 Dec. 14					24	4	4	9.54	0.00339462	1.25247e-05	0.3676	3	0.000268177	5.49124	5.7	41.5	0.368334	0.381395	0.000106235	41.8	10.45	746.069	0.0792589	1.90221				1.90447	0.00225773		0.03447
NRS K.I. WW3 Dec. 14					24	4	4	9.54	0.00339462	1.25247e-05	0.3676	3	0.000268177	5.49124	5.7	31.4	0.368334	0.377711	7.62667e-05	53.1	13.275	947.758	0.0722824	1.73478				1.73684	0.002059		0.0378728
NRS K.I. < 10 1 Dec. 14					24.5	4	4	9.54	0.00339462	1.25247e-05	0.3676	3	0.000268177	5.49124	5.7	55.2	0.368334	0.386393	0.000143885	21.2	5.3	378.389	0.0544444	1.30667	2.05535	0.648406	0.374357	1.30822	0.00155088		0.0384668
NRS K.I. < 10 2 Dec. 14					24.5	4	4	9.54	0.00339462	1.25247e-05	0.3676	3	0.000268177	5.49124	5.7	88.9	0.368334	0.398684	0.000241813	23.4	5.85	417.656	0.100994	2.42387				2.42674	0.00287689		0.0386185
NRS K.I. < 10 3 Dec. 14					24.5	4	4	9.54	0.00339462	1.25247e-05	0.3676	3	0.000268177	5.49124	5.7	89.3	0.368334	0.39883	0.000242975	23.4	5.85	417.656	0.10148	2.43552				2.43841	0.00289071		0.0393349
																															0.0419265
Tumby Bay WW1 A Dec. 14 2L					24	4	2	9.2	0.00327364	1.20783e-05	0.3676	3	0.000268177	5.67881	3.2	151.8	0.367421	0.421617	0.000425149	49.2	24.6	1756.3	0.746688	17.9205	16.1066	5.06985	3.58493	17.9417	0.0211585		0.0503088
Tumby Bay WW1 B Dec. 14 2L					24	4	2	9.2	0.00327364	1.20783e-05	0.3676	3	0.000268177	5.67881	3.2	123.3	0.367421	0.411227	0.000343646	68	34	2427.4	0.834167	20.02				20.0436	0.0236373		0.0524605
Tumby Bay WW2 A Dec. 14 2L					24	4	2	9.2	0.00327364	1.20783e-05	0.3676	3	0.000268177	5.67881	3.2	66.1	0.367421	0.390369	0.000180015	67.3	33.65	2402.41	0.432471	10.3793				10.3916	0.0122547		0.0533453
Tumby Bay WW2 B Dec. 14 2L					24	4	2	9.2	0.00327364	1.20783e-05	0.3676	3	0.000268177	5.67881	3.2	64.1	0.367421	0.389639	0.000174293	67.9	33.95	2423.83	0.422457	10.139				10.1509	0.0119709		0.0585346
Tumby Bay WW3 A Dec. 14 1.5L					24	4	2	9.2	0.00327364	1.20783e-05	0.3676	3	0.000268177	5.67881	3.2	363	0.367421	0.498541	0.0010286	36.4	18.2	1299.37	1.33654	32.077				32.1149	0.0378728		0.0594615
Tumby Bay WW3 B Dec. 14 2.5L					24	4	2	9.2	0.00327364	1.20783e-05	0.3676	3	0.000268177	5.67881	3.2	333.5	0.367421	0.487803	0.00094437	67.7	33.85	2416.69	2.28225	54.7741				54.8388	0.0646709		0.0646709
Tumby Bay < 10 1 Dec. 14					25	4	4	9.2	0.00327364	1.20783e-05	0.3676	3	0.000268177	5.67881	3.2	159.1	0.367421	0.424277	0.000428182	82.7	20.675	1476.08	0.632029	15.1687				15.1866	0.0179094		0.0693181
Tumby Bay < 10 2 Dec. 14					25	4	4	9.2	0.00327364	1.20783e-05	0.3676	3	0.000268177	5.67881	3.2	389	0.367421	0.508003	0.00105872	78.3	19.575	1397.54	1.4796	35.5104	31.7132	16.7587	6.84169	35.5523	0.0419265		0.0693381
Tumby Bay < 10 3 Dec.14					25	4	3.75	9.2	0.00327364	1.20783e-05	0.3676	3	0.000268177	5.67881	3.2	442.9	0.367421	0.527612	0.00120639	77.3	20.6133	1471.67	1.77541	42.6099				42.6602	0.0503088		0.0719289
																															0.0721027
Whyalla WW1 Dec. 14					24	4	3.5	9.54	0.00339462	1.25247e-05	0.3676	3	0.000268177	5.49124	4.1	214.1	0.36775	0.44432	0.000622707	10.7	3.05714	218.262	0.135913	3.26192	14.2459	10.0743	5.8164	3.26579	0.00387113		0.0726208
Whyalla WW2 Dec. 14					24	4	3.5	9.54	0.00339462	1.25247e-05	0.3676	3	0.000268177	5.49124	4.1	227.8	0.36775	0.449311	0.000663298	71	20.2857	1448.28	0.960643	23.0554				23.0828	0.0273613		0.0749514
Whyalla WW3 Dec. 14					24	4	3.5	9.54	0.00339462	1.25247e-05	0.3676	3	0.000268177	5.49124	4.1	169.2	0.36775	0.427959	0.000489647	68.5	19.5714	1397.29	0.684177	16.4202				16.4397	0.0194869		0.0762014
Whyalla < 10 1 Dec. 14					25	4	3.8	9.54	0.00339462	1.25247e-05	0.3676	3	0.000268177	5.49124	4.1	209.4	0.36775	0.442608	0.000584429	79.1	20.8158	1486.13	0.868536	20.8449	15.6304	5.2168	3.01192	20.8696	0.0247379		0.0785608
Whyalla < 10 2 Dec. 14					25	4	4	9.54	0.00339462	1.25247e-05	0.3676	3	0.000268177	5.49124	4.1	100.1	0.36775	0.402768	0.000273393	88.9	22.225	1586.74	0.433803	10.4113				10.4236	0.0123557		0.0797678
Whyalla < 10 3 Dec. 14					25	4	3.5	9.54	0.00339462	1.25247e-05	0.3676	3	0.000268177	5.49124	4.1	161.2	0.36775	0.425043	0.000447297	71.4	20.4	1456.44	0.651462	15.6351				15.6536	0.0185551
Arno Bay WW1 A Dec. 14 2L					21	4	2	9.2	0.00327364	1.20783e-05	0.3676	3	0.000268177	5.67881	5.4	62.4	0.368224	0.389019	0.000186463	61.1	30.55	2181.09	0.406694	9.76066	10.6028	0.947382	0.6699	9.77218	0.011526
Arno Bay WW1 B Dec. 14 2L					21	4	2	9.2	0.00327364	1.20783e-05	0.3676	3	0.000268177	5.67881	5.4	50.4	0.368224	0.384642	0.000147214	92.2	46.1	3291.27	0.484523	11.6285	10.6946			11.6423	0.0137317
Arno Bay WW2 A Dec. 14 2L					21	4	2	9.2	0.00327364	1.20783e-05	0.3676	3	0.000268177	5.67881	5.4	78.3	0.368224	0.394818	0.000238463	51	25.5	1820.55	0.434134	10.4192	11.3333			10.4315	0.0123037
Arno Bay WW2 B Dec. 14 2L					21	4	2	9.2	0.00327364	1.20783e-05	0.3676	3	0.000268177	5.67881	5.4	65.1	0.368224	0.390004	0.000195294	73.2	36.6	2613.03	0.510309	12.2474	11.5889			12.2619	0.0144625
Arno Bay WW3 A Dec. 14 2L					21	4	2	9.2	0.00327364	1.20783e-05	0.3676	3	0.000268177	5.67881	5.4	71.9	0.368224	0.392484	0.000217533	53.7	26.85	1916.93	0.416997	10.0079				10.0197	0.011818
Arno Bay WW3 B Dec. 14 2L					21	4	2	9.2	0.00327364	1.20783e-05	0.3676	3	0.000268177	5.67881	5.4	53.3	0.368224	0.3857	0.0001567	98.1	49.05	3501.89	0.548745	13.1699				13.1854	0.0155518
Arno Bay < 10 1 Dec. 14					22	4	3	9.2	0.00327364	1.20783e-05	0.3676	3	0.000268177	5.67881	5.4	114.6	0.368224	0.408055	0.000340922	49.6	16.5333	1180.38	0.402419	9.65805				9.66946	0.0114048
Arno Bay < 10 2 Dec. 14					22	4	2	9.2	0.00327364	1.20783e-05	0.3676	3	0.000268177	5.67881	5.4	132.4	0.368224	0.414545	0.000396468	43.2	21.6	1542.11	0.611399	14.6736	11.1051	2.81087	1.14753	14.6909	0.0173275
Arno Bay < 10 3 Dec. 14					22	4	3	9.2	0.00327364	1.20783e-05	0.3676	3	0.000268177	5.67881	5.4	85.7	0.368224	0.397517	0.000250723	48	16	1142.31	0.286403	6.87366				6.88178	0.00811685
