# Supplementary material for: Temperate southern Australian coastal waters are characterised by surprisingly high rates of nitrogen fixation and diversity of diazotrophs
Source: PeerJ. 2021 Mar 1;9:e10809. doi: 10.7717/peerj.10809 (PMC7931716; doi:10.7717/peerj.10809)
Supplement: Table S4 — Contains the output from the many generalised linear model, including the mutivariate and univariate test statistics and adjusted P-values. [file peerj-09-10809-s004.xlsx]

## Sheet: Sheet1
Table S4: Analysis of Variance Table results from the manyGLM Multivariate Model
Multi-variate Tests
Variables	Res.DF	DF.diff	Dev	P-value
Temp	8	1	4372.02	0.049
Salinity	7	1	5343.53	0.011
NO3/NO2	6	1	2549.49	0.001
PO4	5	1	3081.7	0.046
SIO4	4	1	497.874	0.062
N2_fix_WC	3	1	145.549	0.019
N2_fix_USF	2	1	286.646	0.005
PC	1	1	16.5791	0.145
PN	0	1	2.44051	0.044
delta15N	0	1	-0.286864	0.624
Uni-variate Tests (Sig. at adjusted P-value < 0.1)
OTUs	Test Statistic	Salinity	N2_fix_USF	PN
OTU51120	28.9; 7.8	0.079	0.079	1
OTU3535	32.1	0.056	0.735	1
OTU1115	30.1	0.069	1	0.854
OTU102504	28.6	0.079	0.9	1
OTU41624	38.8	1	0.009	0.854
OTU9097	34.8	1	0.021	1
OTU83321	26.6	1	0.079	0.475
OTU39174	20.1	1	0.079	0.854
OTU109239	15.7	1	0.079	1
OTU110252	21.9	1	0.079	1
OTU32274	13.9	1	0.079	0.574
OTU27856	17.5	1	0.079	0.854
OTU83489	12.6	0.998	0.079	1
OTU34085	16.8	1	0.079	0.854
OTU114408	15.9	1	0.079	0.653
OTU110067	7.6	1	0.079	0.854
OTU28405	7.8	1	0.079	0.801
OTU9249	2.3	1	0.716	0.058

## Sheet: Sheet3
OTU51120	28.9264	7.79766	5.23203e-05
OTU41624	0.714375	38.7627	0.000817722
OTU9097	3.35585	34.8197	0.000177872
OTU3535	32.1018	0.0278352	2.53322e-05
OTU83321	0.909114	26.5647	0.00400761
OTU1115	30.0763	0.000530838	0.000544274
OTU39174	1.94749	20.894	0.000699079
OTU109239	6.04899	15.7358	0.00018025
OTU110252	1.63489	21.9371	0.000120093
OTU32274	0.000177141	13.8862	0.00342273
OTU102504	28.6149	0.00261122	2.24574e-05
OTU27856	0.00130632	17.4496	0.00288437
OTU83489	7.62521	12.6292	0.000170132
OTU34085	0.00535692	16.7735	0.00162299
OTU114408	1.59236	15.8657	0.00322502
OTU110067	0.117396	7.54672	0.00104021
OTU9249	4.6988	0.0637268	2.33334
OTU28405	0.000680352	7.75463	0.00311028
